# Supplementary material
Source: MDPI journal article supplement (https://www.mdpi.com/2624-6120/4/2/19)
Supplement: s1 [file s1]

Archive with 2 entries (2 files):
- Conversation Coding Manual_Final.pdf
- Data_Entry_Clerk_Interview_Script_DAClassification .pdf
